# Supplementary material
Source: Research Square preprint supplement (doi:10.21203/rs.3.rs-10076074/v1)
Supplement: Supplementary file 1 [file a67ddfaa96c49aa287de7af2.pdf]

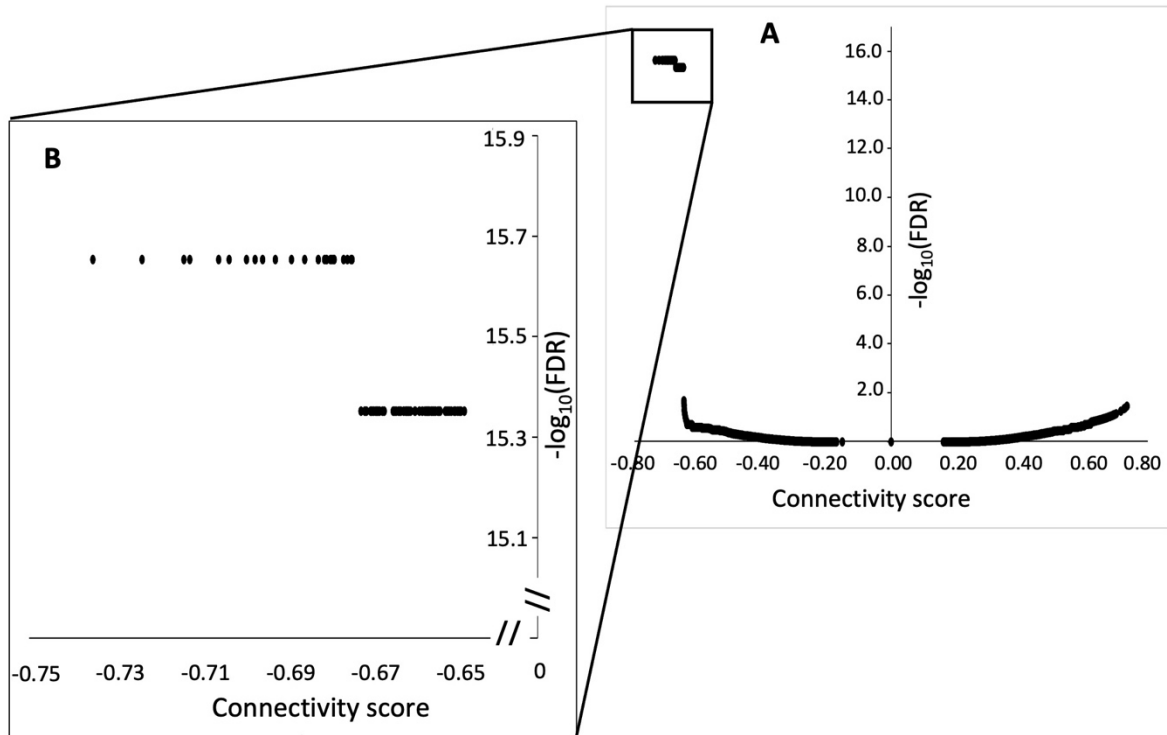

**Supplementary Figure 1. CMap analysis of ME/CFS gene networks.** The 21 upregulated genes together with the 25 downregulated genes common to GSE14577 and GSE227375 depicted in Table 1, and Table 2 were subjected to CMap analysis to identify genetic perturbagens involved in functional signalling networks. The CMap output provided a ranked list of 286,962 genetic perturbagens with connectivity scores between -0.74 and +0.74 and  $-\log_{10}(\text{FDR})$  ranging between 15.65 and 0 (A). The boxed inset region of (A) is expanded to show 83 top-ranked genetic perturbagens with connectivity scores  $< -0.65$  and  $-\log_{10}(\text{FDR}) > 15.35$  (B). The 83 genetic perturbagens depicted in (B) are listed in Supplementary Table 1.

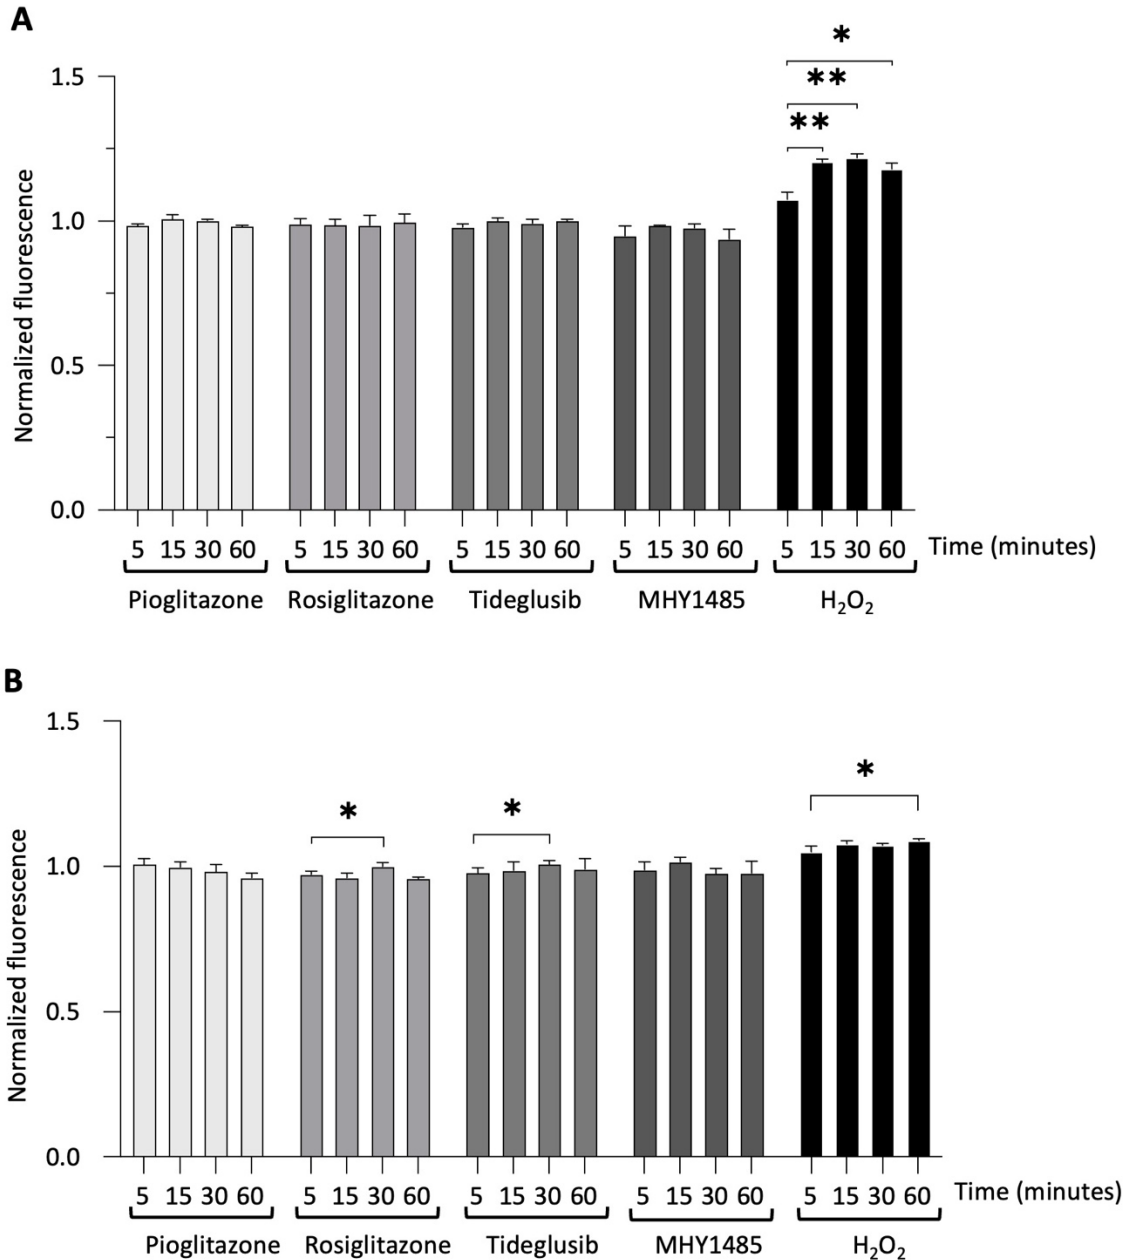

**Supplementary Figure 2. The effect of Pioglitazone, Rosiglitazone, Tideglusib, and MHY1485 on reactive oxygen species (ROS) production.** The C2C12 myoblasts (A) and myotubes (B) were treated with a 1 nM concentration of selected drugs, and ROS were estimated using MitoSox Red assay over 60 minutes. Values shown as mean  $\pm$  standard deviation. *p-values* were calculated using an unpaired t-test. Significant differences are denoted with asterisks \* *p-value* <0.05.

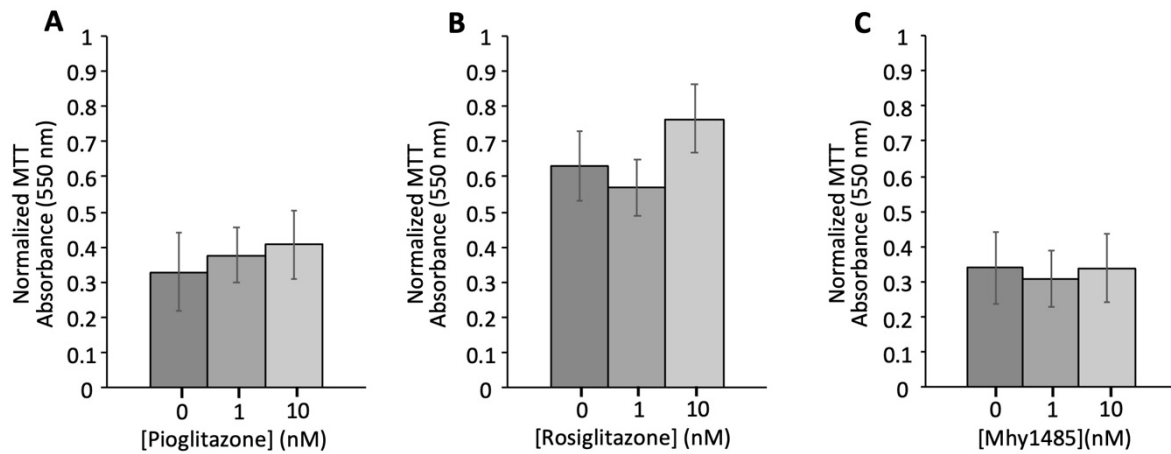

**Supplementary Figure 3. The effect of A) Pioglitazone, B) Rosiglitazone, and C) MHY1485 on cell growth.** The C2C12 myotubes were treated with either vehicle (0 nM), 1 nM, or 10 nM of the indicated compounds, and cell growth was measured using the MTT assay at 24 hours. Values shown as mean  $\pm$  standard deviation. *P-values* were calculated using an unpaired t-test.

**Supplementary Table 1. Genes (genetic perturbagens) identified by CMap. ♦Connectivity Score; \* False Discovery Rate**

| Gene Symbol | Gene name                                                             | FDR*    | CS ♦    |
|-------------|-----------------------------------------------------------------------|---------|---------|
| DHRS3       | dehydrogenase/reductase 3                                             | 15.6536 | -0.735  |
| NT5C2       | 5'-Nucleotidase, Cytosolic II                                         | 15.6536 | -0.7234 |
| ME3         | Malic Enzyme 3                                                        | 15.6536 | -0.7135 |
| PRDX2       | Peroxiredoxin 2                                                       | 15.6536 | -0.7121 |
| IGFBP4      | Insulin Like Growth Factor Binding Protein 4                          | 15.6536 | -0.7053 |
| INS         | Insulin                                                               | 15.6536 | -0.7028 |
| ECSCR       | Endothelial Cell Surface Expressed Chemotaxis And Apoptosis Regulator | 15.6536 | -0.6967 |
| TLE1        | TLE Family Member 1, Transcriptional Corepressor                      | 15.6536 | -0.6949 |
| CD2BP2      | CD2 Cytoplasmic Tail Binding Protein 2                                | 15.6536 | -0.6919 |
| ABCA1       | ATP Binding Cassette Subfamily A Member 1                             | 15.6536 | -0.6881 |
| UBC         | Ubiquitin C                                                           | 15.6536 | -0.685  |
| CPLX1       | Complexin 1                                                           | 15.6536 | -0.6818 |
| RPS6KB2     | Ribosomal Protein S6 Kinase B2                                        | 15.6536 | -0.6803 |
| UBA52       | Ubiquitin A-52 Residue Ribosomal Protein Fusion Product 1             | 15.6536 | -0.6799 |
| STK11       | Serine/Threonine Kinase 11                                            | 15.6536 | -0.6798 |
| SPTLC2      | Serine Palmitoyltransferase Long Chain Base Subunit 2                 | 15.6536 | -0.6789 |
| APEX1       | Apurinic/Apyrimidinic Endodeoxyribonuclease 1                         | 15.6536 | -0.6785 |
| MTHFR       | Methylenetetrahydrofolate Reductase                                   | 15.6536 | -0.6781 |
| TFDP2       | Transcription Factor Dp-2                                             | 15.6536 | -0.678  |
| SERPINA7    | Serpin Family A Member 7                                              | 15.6536 | -0.6758 |
| GTF2I       | General Transcription Factor Iii                                      | 15.6536 | -0.6749 |
| ADCY3       | Adenylate Cyclase 3                                                   | 15.6536 | -0.674  |
| CYBB        | Cytochrome B-245 Beta Chain                                           | 15.6536 | -0.6738 |
| IARS        | Isoleucyl-TRNA Synthetase 1                                           | 15.3525 | -0.6717 |
| CISH        | Cytokine Inducible SH2 Containing Protein                             | 15.3525 | -0.6708 |
| AKT1        | AKT Serine/Threonine Kinase 1                                         | 15.3525 | -0.6707 |
| SWAP70      | Switching B Cell Complex Subunit SWAP70                               | 15.3525 | -0.6704 |
| NPEPL1      | Aminopeptidase Like 1                                                 | 15.3525 | -0.6694 |
| MRPS16      | Mitochondrial Ribosomal Protein S16                                   | 15.3525 | -0.6694 |
| CLNK        | Cytokine Dependent Hematopoietic Cell Linker                          | 15.3525 | -0.6692 |
| HBEGF       | Heparin Binding EGF Like Growth Factor                                | 15.3525 | -0.6691 |
| PPP4C       | Protein Phosphatase 4 Catalytic Subunit                               | 15.3525 | -0.6687 |
| ALAS2       | 5'-Aminolevulinatase Synthase 2                                       | 15.3525 | -0.6682 |
| DHCR24      | 24-Dehydrocholesterol Reductase                                       | 15.3525 | -0.668  |
| CTTN        | Cortactin                                                             | 15.3525 | -0.6678 |
| MIXL1       | Mix Paired-Like Homeobox                                              | 15.3525 | -0.6677 |
| LPAR2       | Lysophosphatidic Acid Receptor 2                                      | 15.3525 | -0.6673 |
| RGL1        | Ral Guanine Nucleotide Dissociation Stimulator Like 1                 | 15.3525 | -0.6666 |
| WIPF1       | WAS/WASL Interacting Protein Family Member 1                          | 15.3525 | -0.6662 |
| LTB         | Lymphotoxin Beta                                                      | 15.3525 | -0.6641 |
| RAVER1      | Ribonucleoprotein, PTB Binding 1                                      | 15.3525 | -0.664  |
| EIF2AK2     | Eukaryotic Translation Initiation Factor 2 Alpha Kinase 2             | 15.3525 | -0.6637 |
| SLC12A7     | Solute Carrier Family 12 Member 7                                     | 15.3525 | -0.6634 |

|          |                                                                                        |         |         |
|----------|----------------------------------------------------------------------------------------|---------|---------|
| CCDC50   | Coiled-Coil Domain Containing 50                                                       | 15.3525 | -0.6628 |
| ARNTL    | Aryl Hydrocarbon Receptor Nuclear Translocator Like                                    | 15.3525 | -0.6623 |
| MYB      | MYB Proto-Oncogene, Transcription Factor                                               | 15.3525 | -0.6616 |
| RDH14    | Retinol Dehydrogenase 14                                                               | 15.3525 | -0.6611 |
| HTD2     | Hydroxyacyl-Thioester Dehydratase Type 2                                               | 15.3525 | -0.6609 |
| CRIM1    | Cysteine Rich Transmembrane BMP Regulator 1                                            | 15.3525 | -0.6606 |
| LPL      | Lipoprotein Lipase                                                                     | 15.3525 | -0.6606 |
| HLA-DQA1 | Major Histocompatibility Complex, Class II, DQ Alpha 1                                 | 15.3525 | -0.6604 |
| NUP85    | Nucleoporin 85                                                                         | 15.3525 | -0.66   |
| CFD      | Complement Factor D                                                                    | 15.3525 | -0.659  |
| APOC2    | Apolipoprotein C2                                                                      | 15.3525 | -0.659  |
| SLF1     | SMC5-SMC6 Complex Localization Factor 1                                                | 15.3525 | -0.6589 |
| CSNK1A1L | Casein Kinase 1 Alpha 1 Like                                                           | 15.3525 | -0.6579 |
| HDAC2    | Histone Deacetylase 2                                                                  | 15.3525 | -0.6572 |
| INTS12   | Integrator Complex Subunit 12                                                          | 15.3525 | -0.6566 |
| FUT3     | Fucosyltransferase 3                                                                   | 15.3525 | -0.6563 |
| PIK3R1   | Phosphoinositide-3-Kinase Regulatory Subunit 1                                         | 15.3525 | -0.6561 |
| IMPDH2   | Inosine Monophosphate Dehydrogenase 2                                                  | 15.3525 | -0.6559 |
| CASP10   | Caspase 10                                                                             | 15.3525 | -0.6558 |
| STK32C   | Serine/Threonine Kinase 32C                                                            | 15.3525 | -0.6556 |
| PIM2     | Pim-2 Proto-Oncogene, Serine/Threonine Kinase                                          | 15.3525 | -0.6551 |
| STXBP2   | Syntaxin Binding Protein 2                                                             | 15.3525 | -0.6548 |
| CLK4     | CDC Like Kinase 4                                                                      | 15.3525 | -0.6545 |
| GAS6     | Growth Arrest Specific 6                                                               | 15.3525 | -0.6541 |
| MAP2K7   | Mitogen-Activated Protein Kinase Kinase 7                                              | 15.3525 | -0.6535 |
| IDE      | Insulin Degrading Enzyme                                                               | 15.3525 | -0.6534 |
| HRH2     | Histamine Receptor H2                                                                  | 15.3525 | -0.6532 |
| GCKR     | Glucokinase Regulator                                                                  | 15.3525 | -0.653  |
| NDUFS5   | NADH:Ubiquinone Oxidoreductase Subunit S5                                              | 15.3525 | -0.653  |
| NQO1     | NAD(P)H Quinone Dehydrogenase 1                                                        | 15.3525 | -0.6518 |
| TNFAIP3  | TNF Alpha Induced Protein 3                                                            | 15.3525 | -0.6514 |
| POR      | Cytochrome P450 Oxidoreductase                                                         | 15.3525 | -0.6509 |
| FER      | FER Tyrosine Kinase                                                                    | 15.3525 | -0.6504 |
| PTGFR    | Prostaglandin F Receptor                                                               | 15.3525 | -0.6497 |
| MYLK2    | Myosin Light Chain Kinase 2                                                            | 15.3525 | -0.6496 |
| EXT1     | Exostosin Glycosyltransferase 1                                                        | 15.3525 | -0.6488 |
| MGAT4A   | Alpha-1,3-Mannosyl-Glycoprotein 4-Beta-N-Acetylglucosaminyltransferase A               | 15.3525 | -0.6484 |
| MAPK8    | Mitogen-Activated Protein Kinase 8                                                     | 15.3525 | -0.6483 |
| IL10     | Interleukin 10                                                                         | 15.3525 | -0.6481 |
| KIR3DL1  | Killer Cell Immunoglobulin Like Receptor, Three Ig Domains And Long Cytoplasmic Tail 1 | 15.3525 | -0.6473 |

**Supplementary Table 2.** Drugs with a negative connectivity score and  $-\log_{10}(\text{FDR}) > 15.35$  identified by CMap. ♦ Connectivity Score; \* False Discovery Rate

| Compounds            | Primary target                                                                                                | Classification                                                         | Clinically tested | Indication(s)                        | CS ♦  | FDR*  |
|----------------------|---------------------------------------------------------------------------------------------------------------|------------------------------------------------------------------------|-------------------|--------------------------------------|-------|-------|
| SB-705498            | TRPV antagonist                                                                                               | Nociceptor antagonist, anti-inflammatory                               | Yes               | Pain, rhinitis, chronic cough        | -0.73 | 15.65 |
| GDC-0152             | XIAP inhibitor                                                                                                | Antagonist of inhibitor of apoptosis (IAP) proteins (SMAC mimetic)     | Yes               | Cancer                               | -0.69 | 15.65 |
| Mefenamic acid       | Cyclooxygenase 1 and 2 inhibitor                                                                              | Non-steroidal anti-inflammatory drug (NSAID)                           | Yes               | Acute and chronic pain, inflammation | -0.69 | 15.65 |
| Skimmianine          | Not determined                                                                                                | Potential antioxidant, antiviral, antimicrobial, and anti-inflammatory | No                | Not known                            | -0.69 | 15.65 |
| Indoximod            | Indoleamine 2,3-dioxygenase inhibitor, mTORC1 activator                                                       | Immuno-metabolic adjuvant                                              | Yes               | Cancer                               | -0.67 | 15.35 |
| Arcyriaflavin-a      | Multi-targeted kinase inhibitor, PIM, CDK inhibitor,                                                          | Not known                                                              | No                | Not known                            | -0.67 | 15.35 |
| Ginkgolide-a         | Platelet activating factor (PAF) receptor antagonist                                                          | Anti-inflammatory, anti-allergy                                        | Yes               | Stroke, cognition                    | -0.67 | 15.35 |
| Idalopirdine         | Antagonist of the 5-HT <sub>6</sub> serotonin receptor                                                        | Serotonin, glutamate and cholinergic neurotransmission                 | Yes               | Dementia, schizophrenia              | -0.67 | 15.35 |
| PF-750               | Fatty acid amide hydrolase (FAAH) inhibitor                                                                   | Cannabinoid receptor activation                                        | No                | Not known                            | -0.67 | 15.35 |
| PRE-084              | Sigma receptor agonist                                                                                        | Neuroprotective, anti-inflammatory                                     | No                | Not known                            | -0.66 | 15.35 |
| Pracinostat (SB-939) | Histone deacetylase inhibitor                                                                                 | Epigenetic regulation                                                  | Yes               | Cancer                               | -0.66 | 15.35 |
| Buspirone            | Partial 5-HT <sub>1A</sub> serotonin receptor agonist and low affinity antagonist of the dopamine D2 receptor | Serotonin and dopamine neurotransmission                               | Yes               | Anxiety, depression                  | -0.66 | 15.35 |
| Timofibrate          | Peroxisome proliferator-activated receptor agonist                                                            | Mitochondrial and peroxisomal fatty acid oxidation                     | No                | Not known                            | -0.66 | 15.35 |
| VX-702               | p38 mitogen-activated kinase inhibitor                                                                        | Anti-inflammatory                                                      | Yes               | Rheumatoid arthritis                 | -0.65 | 15.35 |
